# Supplementary material for: Comparative analysis of transcriptome remodeling in plaque-associated and plaque-distant microglia during amyloid-β pathology progression in mice
Source: J Neuroinflammation. 2022 Sep 24;19:234. doi: 10.1186/s12974-022-02581-0 (PMC9508749; doi:10.1186/s12974-022-02581-0)
Supplement: Supplementary file 16 — Additional file 16: Table S4. Fold-change of typical microglial homeostatic genes in XO4+; DAM; ARM; MGnD and PAMs (NS: non significant; −: not reported). [file 12974_2022_2581_MOESM16_ESM.xlsx]

## Sheet: S4-FC in µglia subtypes
Table S4: Fold-change of typical microglial homeostatic genes in XO4+; DAM; ARM; MGnD and PAMs (NS: non significant; -: not reported)
	Grubman et al., 2021		Keren-shaul et al., 2017		Sala-Frigerio etal., 2021		Kraseman et al., 2017						Present study
	XO4+ microglia		DAMs		ARMs		7 mo all microglia		10 mo all microglia		17 mo all µglia		8/12-mo PAMs
	log2(FC)	p-adj	log2(FC)	p-adj	log2(FC)	p-adj	log2(FC)	p-adj	log2(FC)	p-adj	log2(FC)	p-adj	log2(ratio)	p-adj
Tmem119	-2.41894	5.9429e-81	-2.45	7.78003e-57	-1.92068	<1E-300	-0.353606	NS	-0.710317	NS	-0.222606	NS	-0.220182	NS
P2ry12	-1.5968	1.25e-49	-2.05155	3.86792e-59	-0.883909	<1E-300	-0.391199	NS	-0.886732	0.0136	-0.302891	NS	-0.162628	NS
P2ry13	-	-	-1.58659	2.43289e-22	-0.685809	8.07061e-284	-0.366685	NS	-0.975421	NS	-0.266726	NS	-0.288549	NS
Crybb1	-2.69821	4.24397e-42	-3.33127	1.7242e-11	-1.89	<1E-300	-0.334514	NS	-0.650399	NS	-0.824457	NS	-1.59414	0.000438
Cx3cr1	-	-	-1.35991	3.12957e-53	-0.424007	1.1249e-261	-0.225767	NS	-0.679118	0.0314	-0.129208	NS	0.271086	NS
Sall1	-	-	-1.18953	2.03438e-05	-0.652825	3.66162e-157	-0.385575	NS	-0.717887	NS	-0.0910091	NS	0.488809	NS
Hexb	-	-	-0.03599	0.354871	-	-	-0.203003	0.0334	-0.578649	< 1E-4	0.122775	NS	1.38228	1.43e-07
