# Supplementary material for: Comparative analysis of transcriptome remodeling in plaque-associated and plaque-distant microglia during amyloid-β pathology progression in mice
Source: J Neuroinflammation. 2022 Sep 24;19:234. doi: 10.1186/s12974-022-02581-0 (PMC9508749; doi:10.1186/s12974-022-02581-0)
Supplement: Supplementary file 18 — Additional file 18: Table S6. PAM vs CM, Genes networks and subnetworks (highlighted in green: hub genes). [file 12974_2022_2581_MOESM18_ESM.xlsx]

## Sheet: Gene-subnetworks
Table S6: PAM vs CM, Genesnetworks and sub-netoworks (highlighted in greens : hub genes)
Turquoise module																	Blue module
C1 (97)	C1.1	C1.2	C2 (91)	C2.1	C2.2	C3 (77)	C3.1	C3.2	C3.3	C4 (56)	C5 (49)	C6 (31)	C7 (26)	C8 (26)	C9 (22)	C10 (21)	C0 (48)
All genes	Chemotaxism	Neg. Reg. Endopeptidase	All genes	Regulation of cell shape	Antigen proc. & present.	All genes	Recpt. Endocytosis	Vesicle organization	N Glycosylation	Cytoplasmic translation	Shyngolipids catabolism	Ifnß signalling	Cell cycle transition	-	ROS production	Protein polyubiquitination	Synaptic vesicle cycle
A2m	Gna14	Apoc4	Abi2	Ablim2	Abi2	Adam15	Dnase2a	Rab34	Ncstn	Agtrap	Actr10	AI607873	Cables1	Asah1	AF251705	Anapc13	Ap2m1			Rank 1-3
Ackr3	Cxcl10	A2m	Abi3	Abr	Abi3	Amph	Dab2	Rab32	Ssr4	Dock4	Aga	Ddx58	Cbfb	B2m	Atp6ap2	Asb10	Arfgap1
Adam17	Cxcr4	Procr	Ablim2	Akap13	Actb	Anp32b	Necap2	Rab31	Pafah1b2	Eef1a1	Anxa2	Dhx58	Ccnd1	Cd22	Bcl2a1b	Cops7a	Atxn2			Rank 4-6
Adamtsl3	Ccl4	Thbs1	Abr	Arap1	Aldh3b1	Arpc2	Scarb2	Rab33a	Rnf13	Eef1a2	Cct8	Gbp6	Ccnd2	Cd5	Cd53	Fbxl16	Calm1
Adcy7	Ccl3	Serping1	Actb	Arhgap17	Arpc1b	Arpc4	Vamp3	Rab19	Magt1	Eef1d	Cnpy2	Ifi204	Ccnd3	Cd72	Clec5a	Fbxo21	Calm2			Rank 7-10
Adra2c	Hcar2	Afp	Akap13	Arhgap25	Calr	Arpc5	Snx9	Rabggta	Krtcap2	Eef2	Creg1	Ifi27	Cdk1	Chil1	Cyba	Fbxw4	Camk2b
Afp	Ccl6	Adamtsl3	Aldh3b1	Arhgap31	Canx	Atp11c	Cpd	Rab40b	Cpne3	Eif3f	Cst7	Ifi27l2a	Cdk2	Clint1	Cybb	Klhl9	Cck
Apba2	Cxcl16	Timp1	Arap1	Arhgap44	Cd14	Bmp2k	Bmp2k	Rab3a	Manba	Eif4h	Ctsa	Ifi35	Cdk4	Cstb	Fcer1g	Lmo7	Chgb
Apbb2	C3ar1	Lpl	Arhgap17	Arhgap9	Cd28	Bst2	Sh3glb1	Ptp4a2	Lamp1	Elavl4	Ctsc	Ifi44	Cdk6	Ctsd	Itgam	Ndfip1	Chrm1
Aplp1	Gngt2	C4b	Arhgap25	Arhgdia	Cd44	Cd37	Adam15	Rab20	Bst2	Fam86	Dnajc3	Ifit2	Cdk7	Ctsh	Itgb2	Pja2	Clstn1
Apoc2	Gng5	Spp1	Arhgap31	Arhgdib	Cd83	Cd63	Tpd52	Rab7b	Syngr1	Frrs1	Dpp7	Ifit3	E2f2	Ctss	Lair1	Rnf130	Dnm1
Apoc4	Gpr183	Csf1	Arhgap44	Arhgef4	Cd86	Cd68	Anp32b		Ssr1	Frrs1l	Emp2	Igtp	Ensa	Ctsz	Nrros	Rnf14	Gria2
Apoe	Gpsm3	Igf1	Arhgap9	Fes	Dock8	Clta	Clta		Stt3a	Gnb2l1	Fabp5	Irf1	Lmo2	Cyfip1	Plau	Snx20	Grin1
App	Ramp1	Fblim1	Arhgdia	Gdi1	Erap1	Cpd	Snx5		Ddost	Npsr1	Frrs1	Irf7	Myc	Dock2	Plaur	Socs6	Itpka
Arhgef25	C5ar1	Apoc2	Arhgdib	Gmip	Fcgr1	Cpne3	M6pr		Lamtor1	Ost4	Ftl1	Irf9	Ncaph	Fcgrt	Scamp1	Trim32	Kalrn
Bche	Adcy7	Srgn	Arhgef4	Gna13	Fcgr2b	Dab2	Arpc2		Surf4	Pcbp2	Fuca1	Irgm1	Nde1	Fth1	Serpine2	Trim9	Kcnh1
C3ar1	Ednrb	Adam17	Arpc1b	Hspb6	Fcgr3	Dad1	Myo6		Cd37	Rasl2-9	Fuca2	Isg15	Npm1	Ghdc	Siglech	Uba7	Kdelr3
C4b	Gnai2	Apoe	Calr	Lcp1	Fgr	Ddost	Arpc4		Lrmp	Rpl13	Ggh	Lgals3bp	Paf	Golga7	Slc11a1	Ube2l3	Kif5b
C5ar1	Gng12	Pros1	Canx	Lpxn	H2-D1	Dnajc6	Yipf6		Lpcat1	Rpl13a	Glb1	Nmi	Pbk	Hpse	Slc44a2	Ube2l6	Kifap3
Ccl3	Pik3cg	Fam20c	Cd14	Mat2b	H2-K1	Dnase2a	Arpc5		Tusc3	Rpl14	Gm2a	Oas1a	Rrbp1	Idh1	Snap23	Ube2o	Klc1
Ccl4	Itpr2	Sparc	Cd28	Msn	H2-M3	Dnm2	Dnm2		Ergic3	Rpl18a	Gns	Oas1g	Slc1a5	Il3ra	Tmbim1	Znrf2	Mapk10
Ccl6	Gnas	Shisa5	Cd44	Mul1	H2-Q4	Eif4enif1	Picalm		Tmem258	Rpl22	Grn	Oas3	Spc25	Inpp5d	Tspan14		Mtmr7
Cd164	Rgs10	Nucb1	Cd83	Myl12a	H2-T23	Ergic3	Yipf3		Cd63	Rpl23	Gusb	Oasl2	Stmn1	Ptpn6			Neto1
Chrm4	Gna12	Gas6	Cd86	Ncf1	Hvcn1	Glipr1	Snx18		Ncln	Rpl32	Hexa	Phf11d	Yaf2	Spock3			Nrn1
Clu	Cd164	Clu	Dock8	Ncf2	Iqgap1	Krtcap2	Yif1a		Tmem30a	Rpl36	Hexb	Rsad2	Ywhag	Sptssa			Nsf
Csf1	Gng10	Qsox1	Erap1	Pfn1	Itgax	Lamp1	Wasl		Cd68	Rpl36al	Hivep2	Sp100	Zwint	Timp2			Olfm1
Cst3	Gpr37l1	Igfbp2	Fcgr1	Plekhg5	Lgals3	Lamp2	Amph		Atp11c	Rpl37	Impdh1	Trim30a					Olfm2
Ctgf	S1pr1	Mertk	Fcgr2b	Pls3	Lilrb4	Lamtor1	Necap1		Dad1	Rpl37a	Lyz2	Usp18					Pak1
Cxcl10	Psap	Igfbp5	Fcgr3	Rac2	Mrc2	Lpcat1	Syt11		Rpn2	Rpl39	Man2b1	Usp25					Pi4ka
Cxcl16	Rgs7	Prkcsh	Fes	Rhobtb2	Myh9	Lrmp	Dnajc6		Lamp2	Rpl4	Man2b2	Xaf1					Plcb1
Cxcr4	Gng3	Trf	Fgr	Rhoc	Myo1e	M6pr	Eif4enif1		Pfdn5	Rpl41	Mapk1	Zbp1					Ppp3ca
Ednrb	Gnai1	Fermt3	Gdi1	Rhoq	Myo9b	Magt1	Synj1		Glipr1	Rpl8	Mknk1						Ppp3r1
Fam20c	Grm5	Golm1	Gmip	Rhot1	Nckap1	Manba				Rplp0	Mknk2						Ptk2b
Fblim1	Nae1	Cst3	Gna13	Rnd3	Nckap1l	Myo6				Rplp1	Naga						Rab15
Fermt3	Gnb5	Hsp90b1	H2-D1	Rock1	Nlrc5	Ncln				Rplp2	Naip2						Rab6a
Gas6	Arhgef25	Vegfb	H2-K1	Rock2	Pak3	Ncstn				Rps11	Nlrp1b						Sh3gl2
Gna12	Gng2	Scg5	H2-M3	Sema4d	Pdia3	Necap1				Rps14	Npc2						Siglece
Gna14	Gnb4	Vgf	H2-Q4	Sh3bp1	Serpinb1c	Necap2				Rps15	Padi2						Slc17a7
Gnai1	Adra2c	Tyro3	H2-T23	Spata13	Sirpa	Pafah1b2				Rps15a	Pea15a						Snap25
Gnai2	Homer1	Ctgf	Hspb6	Tiam2	Slc2a3	Pfdn5				Rps18	Prdx6						Snap91
Gnas	Penk	Bche	Hvcn1	Wdr1	Tap1	Picalm				Rps19	Pycard						Snca
Gnb4	Chrm4	Lamb1	Iqgap1		Tap2	Ptp4a2				Rps2	Renbp						Stxbp1
Gnb5	Sstr2		Itgax		Tapbp	Rab19				Rps20	Rilpl2						Sv2b
Gng10	Ackr3		Lcp1		Thra	Rab20				Rps24	Rnaset2b						Syn1
Gng12	Pth2r		Lgals3		Tlr2	Rab31				Rps25	S100a11						Syt1
Gng2			Lilrb4		Wasf2	Rab32				Rps26	Sdcbp						Syt3
Gng3			Lpxn		Wipf1	Rab33a				Rps27l	Serpina3n						Tmem132a
Gng5			Mat2b			Rab34				Rps3	Tubb4b						Vamp2
Gngt2			Mrc2			Rab3a				Rps3a1	Tubb5
Golm1			Msn			Rab40b				Rps4x
Gpr183			Mul1			Rab5c				Rps5
Gpr37l1			Myh9			Rab7b				Rps8
Gpsm3			Myl12a			Rabggta				Rps9
Grm5			Myo1e			Rin2				Sec61a1
Hcar2			Myo9b			Rnf13				Serp1
Homer1			Ncf1			Rpn2				Sil1
Hsp90b1			Ncf2			Scarb2
Igf1			Nckap1			Sh3glb1
Igfbp2			Nckap1l			Snx18
Igfbp5			Nlrc5			Snx5
Itm2b			Pak3			Snx9
Itpr2			Pdia3			Ssr1
Lamb1			Pfn1			Ssr4
Lpl			Plekhg5			Stt3a
Mertk			Pls3			Surf4
Msr1			Rac1			Syngr1
Nae1			Rac2			Synj1
Nucb1			Rhoa			Syt11
Penk			Rhobtb2			Tmem258
Pik3cg			Rhoc			Tmem30a
Prkcsh			Rhog			Tpd52
Procr			Rhoq			Tusc3
Pros1			Rhot1			Vamp3
Psap			Rnd3			Wasl
Pth2r			Rock1			Yif1a
Qsox1			Rock2			Yipf3
Ramp1			Sema4d			Yipf6
Rgs10			Serpinb1c
Rgs7			Sh3bp1
S1pr1			Sirpa
Scg5			Slc2a3
Serping1			Spata13
Shisa5			Tap1
Sparc			Tap2
Spp1			Tapbp
Srgn			Thra
Sstr2			Tiam2
Thbs1			Tlr2
Timp1			Wasf2
Trf			Wdr1
Tyro3			Wipf1
Vegfb
Vgf
