# Supplementary material for: Comparative analysis of transcriptome remodeling in plaque-associated and plaque-distant microglia during amyloid-β pathology progression in mice
Source: J Neuroinflammation. 2022 Sep 24;19:234. doi: 10.1186/s12974-022-02581-0 (PMC9508749; doi:10.1186/s12974-022-02581-0)
Supplement: Supplementary file 22 — Additional file 22: Table S10. GO analysis of the PAM vs CM:Age DEGs Turquoise module, related to Figure S7B, C. [file 12974_2022_2581_MOESM22_ESM.xlsx]

## Sheet: S10_GO-analyses_Turquoise
Table S10: GO analysis of the PAM vs CM:Age DEGs Turquoise module, related to Figure S7B-C
source	term_name	term_id	adj_pv	-log10(adj-pv)	term_size	query_size	intersection_size	effective_domain_size
GO:BP	actin filament organization	GO:0007015	0.00076701	3.1152	445	89	12	21354
GO:BP	dendritic cell differentiation	GO:0097028	0.00397363	2.40081	48	89	5	21354
GO:BP	actin filament polymerization	GO:0030041	0.00419585	2.37718	198	89	8	21354
GO:BP	wound healing	GO:0042060	0.01053	1.97757	383	89	10	21354
GO:BP	actin polymerization or depolymerization	GO:0008154	0.011197	1.9509	226	89	8	21354
GO:BP	regulation of peptidase activity	GO:0052547	0.0130621	1.88399	485	89	11	21354
GO:BP	regeneration	GO:0031099	0.0135757	1.86724	232	89	8	21354
GO:BP	lymphocyte migration	GO:0072676	0.0195645	1.70853	114	89	6	21354
GO:BP	regulation of actin filament polymerization	GO:0030833	0.026502	1.57672	182	89	7	21354
GO:BP	positive regulation of peptidase activity	GO:0010952	0.0400928	1.39693	194	89	7	21354
GO:BP	regulation of actin polymerization or depolymerization	GO:0008064	0.0457352	1.33975	198	89	7	21354
GO:BP	regulation of endopeptidase activity	GO:0052548	0.0462065	1.3353	454	89	10	21354
GO:BP	regulation of actin filament length	GO:0030832	0.0472438	1.32565	199	89	7	21354
