# Supplementary material for: Comparative analysis of transcriptome remodeling in plaque-associated and plaque-distant microglia during amyloid-β pathology progression in mice
Source: J Neuroinflammation. 2022 Sep 24;19:234. doi: 10.1186/s12974-022-02581-0 (PMC9508749; doi:10.1186/s12974-022-02581-0)
Supplement: Supplementary file 23 — Additional file 23: Table S11. Human postmortem samples used in the study (Highlighted in grey, samples processed for RNAscope) [file 12974_2022_2581_MOESM23_ESM.xlsx]

## Sheet: Samples-MM#2 (2)
Table S11: Human postmortem samples used in the study (Highlighted in grey, samples processed for RNAscope)
Sample ID	Clinical Diagnosis	SEX	AGE	PMI (h)	Brain weight (g)	Brain Regions	ApoE	Braak	MMSE (/30)	RIN
Hu_B01	CTR	M	70	10.5	1388	FC	3,3	1		7.9
Hu_C05	CTR	M	75	17	1390	FC	3,3	1		7.3
Hu_D01	CTR	M	73	8	1249	FC	3,3	4		9
Hu_D04	CTR	M	63	5	1360	FC	-	1		7.6
Hu_D14	CTR	M	60	14	1500	FC	3,3	1		8.4
Hu_D15	CTR	M	43	30.5	1545	FC	3,3	0		9.2
Hu_D17	CTR	M	47	12	1383	FC	3,4	1		8.2
Hu_E03	CTR	M	89	8.5	-	FC	-	?		8.4
Hu_E07	CTR	M	87	6.4	-	FC	-	?		9.4
Hu_E15	CTR	M	51	15	-	FC	-	?		10
Hu_E19	CTR	M	52	23.5	-	FC	-	?		10
Hu_B02	CTR	F	65	19	1207	FC	3,3	0		7.1
Hu_C03	CTR	F	74	3.5	1000	FC	2,3	1		9.6
Hu_D02	CTR	F	85	14	1198	FC	3,3	3	28	8.1
Hu_D07	CTR	F	82	19.5	-	FC	-	?		7.2
Hu_D09	CTR	F	83	22	1102	FC	3,3	3		8.2
Hu_D12	CTR	F	54	7	-	FC	-	?		9.1
Hu_D13	CTR	F	57	12	-	FC	-	?		9
Hu_E05	CTR	F	68	32	1278	FC	3,3	0		8.6
Hu_A02	AD	M	83	26	1348	FC	4,4	5	11	7.3
Hu_A04	AD	M	79	3.5	975	FC	-	6		8.3
Hu_B05	AD	M	75	17	1076	FC	-	6		6
Hu_C02	AD	M	79	6	1233	FC	3,3	5		8.7
Hu_D05	AD	M	62	14	1560	FC	-	5		7.3
Hu_D10	AD	M	87	9	1383	FC	4,4	5	20	6.7
Hu_A03	AD	F	91	14	1066	FC	-	6		8.2
Hu_A05	AD	F	88	13	970	FC	2,3	6		8.3
Hu_B03	AD	F	83	19	994	FC	3,4	5	24	7.1
Hu_B04	AD	F	83	10	1067	FC	-	5		9.3
Hu_D03	AD	F	91	11.5	1161	FC	-	5		7.8
Hu_D06	AD	F	54	5	1180	FC	-	6		7
Hu_D08	AD	F	86	3	975	FC	3,4	5	12	6.9
Hu_D16	AD	F	85	4	957	FC	-	5		7.9
